# Supplementary material for: Neural Mechanisms Underlying 5-HTTLPR-Related Sensitivity to Acute Stress
Source: Atypon-hosted journal article supplement (doi:10.1176/appi.ajp.2011.10111699), 2012-02-17
Supplement: appi.ajp.2011.10111699.ds001.pdf [file appi.ajp.2011.10111699.ds001.pdf]

*Supplementary Figure 1.* Regions showing an effect of genotype in a whole brain t-test (SS > L carriers)<sup>a</sup>

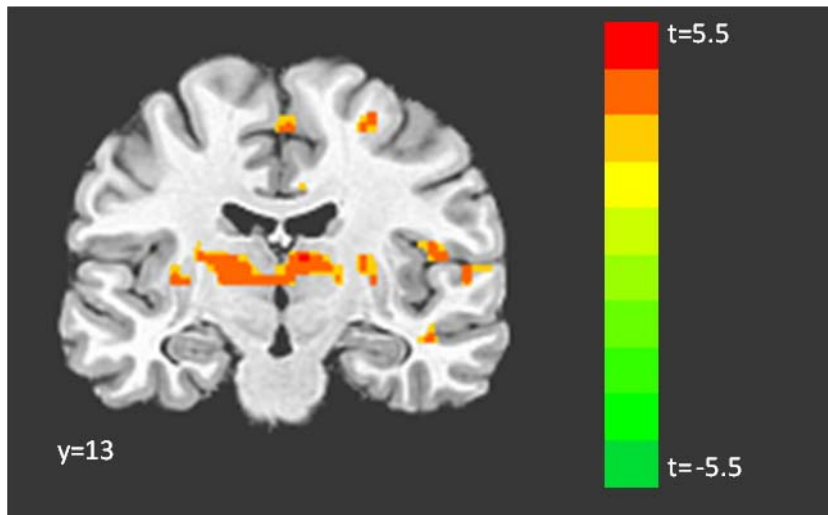

<sup>a</sup>Contrast displayed in neurological convention (left=left) at corrected  $p < .05$ ,  $t > 2.95$ , color bar indicates t statistic. Coordinates for all regions showing an effect of genotype are displayed in Table 1.

*Supplementary Table 1.* Regions showing an effect of 5-HTTLPR genotype in a whole brain regression (SS > LS > LL)<sup>a</sup>

| Region                      | Side | BA    | x     | y     | z     | voxels | r    |
|-----------------------------|------|-------|-------|-------|-------|--------|------|
| Thalamus (anterior nucleus) | L    | -     | -6.9  | -3.0  | 4.8   | 81     | 0.50 |
| Fusiform gyrus              | L    | -     | -27.5 | -61.4 | -12.3 | 42     | 0.59 |
| Putamen                     | L    | -     | 20.6  | -3.0  | 4.8   | 32     | 0.51 |
| Middle temporal gyrus       | R    | 21    | 44.7  | -6.4  | -12.3 | 28     | 0.50 |
| Superior temporal gyrus     | R    | 22    | 58.4  | -44.2 | 8.3   | 25     | 0.47 |
| Middle frontal gyrus        | R    | 6     | 27.5  | 7.3   | 53.0  | 23     | 0.53 |
| Medial frontal gyrus        | R    | 10/32 | 6.9   | 52.0  | 1.4   | 19     | 0.47 |
| Middle temporal gyrus       | R    | 21    | -55.0 | -30.5 | -2.0  | 17     | 0.53 |
| Superior temporal gyrus     | R    | -     | 41.3  | -33.9 | 1.4   | 17     | 0.52 |
| Supramarginal gyrus         | L    | 40    | -55.0 | -51.1 | 32.3  | 17     | 0.49 |
| Middle frontal gyrus        | L    | 6     | -27.5 | -6.4  | 53.0  | 15     | 0.47 |
| Putamen                     | L    | -     | -20.6 | 14.2  | 1.4   | 14     | 0.53 |
| Superior temporal gyrus     | R    | 39    | 41.3  | -54.5 | 25.5  | 13     | 0.53 |
| Culmen                      | R    | -     | 27.5  | -47.7 | -22.7 | 12     | 0.51 |
| Caudate                     | R    | -     | 13.8  | 14.2  | 4.8   | 12     | 0.45 |
| Middle temporal gyrus       | R    | 37    | 48.1  | -47.7 | -5.5  | 11     | 0.54 |
| Superior temporal gyrus     | L    | 38    | -48.1 | -7.3  | -12.3 | 7      | 0.41 |
| Amygdala                    | R    | -     | 17.2  | -3.0  | -8.9  | 7      | 0.43 |
| Precuneus                   | R    | 7     | 6.9   | -47.7 | 53.0  | 7      | 0.52 |

<sup>a</sup>All clusters survived corrected  $p < .05$ ,  $t > 2.95$ . Coordinates indicate the peak of the cluster. Asterisk indicates a region which was identified as a supra-cluster, and the sub-cluster peaks are listed directly below it.

Supplementary Table 2. Pairwise comparison of individual genotype groups<sup>a</sup>

| Region                      | LS vs LL |                 | SS vs LL |                 | SS vs LS |                 |
|-----------------------------|----------|-----------------|----------|-----------------|----------|-----------------|
|                             | p        | mean difference | p        | mean difference | p        | mean difference |
| Thalamus (anterior nucleus) | .503     | 0.02            | <.001    | 0.16            | <.001    | 0.14            |
| Fusiform gyrus              | .040     | 0.14            | <.001    | 0.39            | <.001    | 0.25            |
| Putamen                     | .624     | 0.02            | <.001    | 0.16            | <.001    | 0.14            |
| Middle temporal gyrus       | .074     | 0.05            | <.001    | 0.19            | <.001    | 0.14            |
| Superior temporal gyrus     | .997     | 0.00            | <.001    | 0.19            | <.001    | 0.19            |
| Middle frontal gyrus        | .030     | 0.10            | <.001    | 0.21            | .005     | 0.11            |
| Medial frontal gyrus        | .154     | 0.09            | <.001    | 0.29            | .001     | 0.20            |
| Middle temporal gyrus       | .128     | 0.07            | <.001    | 0.19            | .002     | 0.12            |
| Superior temporal gyrus     | .116     | 0.04            | <.001    | 0.12            | .001     | 0.08            |
| Supramarginal gyrus         | .311     | 0.06            | <.001    | 0.30            | <.001    | 0.24            |
| Middle frontal gyrus        | .026     | 0.11            | <.001    | 0.21            | .026     | 0.10            |
| Putamen                     | .527     | 0.03            | .001     | 0.21            | .001     | 0.18            |
| Superior temporal gyrus     | .399     | 0.03            | <.001    | 0.16            | .001     | 0.12            |
| Culmen                      | .009     | 0.14            | <.001    | 0.28            | .006     | 0.14            |
| Caudate                     | .244     | 0.06            | .001     | 0.21            | .003     | 0.15            |
| Middle temporal gyrus       | .025     | 0.09            | <.001    | 0.23            | <.001    | 0.14            |
| Superior temporal gyrus     | .337     | 0.04            | <.001    | 0.22            | <.001    | 0.18            |
| Amygdala                    | .245     | 0.08            | <.001    | 0.31            | .001     | 0.22            |
| Precuneus                   | .836     | -0.01           | <.001    | 0.12            | <.001    | 0.13            |

<sup>a</sup> p-value obtained from pairwise post-hoc comparisons after ANOVA. Table shows that the majority of clusters did not show significant differences between LL and LS individuals, whereas SS individuals were significantly different from both LL and LS individuals.

Supplementary Table 3. Beta values obtained from interaction analysis of 5-HTTLPR, brain activation and responses to the task

| Brain Region | Neural ROI ( $\beta$ ) | 5HTTLPR genotype ( $\beta$ ) | Interaction term ( $\beta$ ) |
|--------------|------------------------|------------------------------|------------------------------|
|--------------|------------------------|------------------------------|------------------------------|

*Outcome: Anxiety in response to task*

|             |                |                |                |
|-------------|----------------|----------------|----------------|
| Amygdala    | -.146, p = .62 | -.058, p = .75 | .132, p = .64  |
| BA9         | -.207, p = .39 | -.228, p = .20 | .496, p = .04* |
| Left Insula | -.225, p = .20 | .546, p = .03* | -.269, p = .28 |

*Outcome: Success at regulating anxiety*

|             |                |                   |                 |
|-------------|----------------|-------------------|-----------------|
| Amygdala    | -.327, p = .26 | -.06, p = .72     | .389, p = .17   |
| BA9         | -.082, p = .75 | -.072, p = .70    | .127, p = .62   |
| Left Insula | .053, p = .75  | -.754, p = .003** | .580, p = .017* |

<sup>a</sup> Functional clusters were obtained from SS > L carriers analysis. Interaction analyses examined amygdala (peak at x= 17, y=-3, z=-12), insula (peak at x=-31, y=-20, z=-15), dorsomedial prefrontal cortex (peak at x=-14, y=35, z=36).
